# Supplementary material
Source: PubMed Central journal article supplement (PMC5347427)

All SNPs

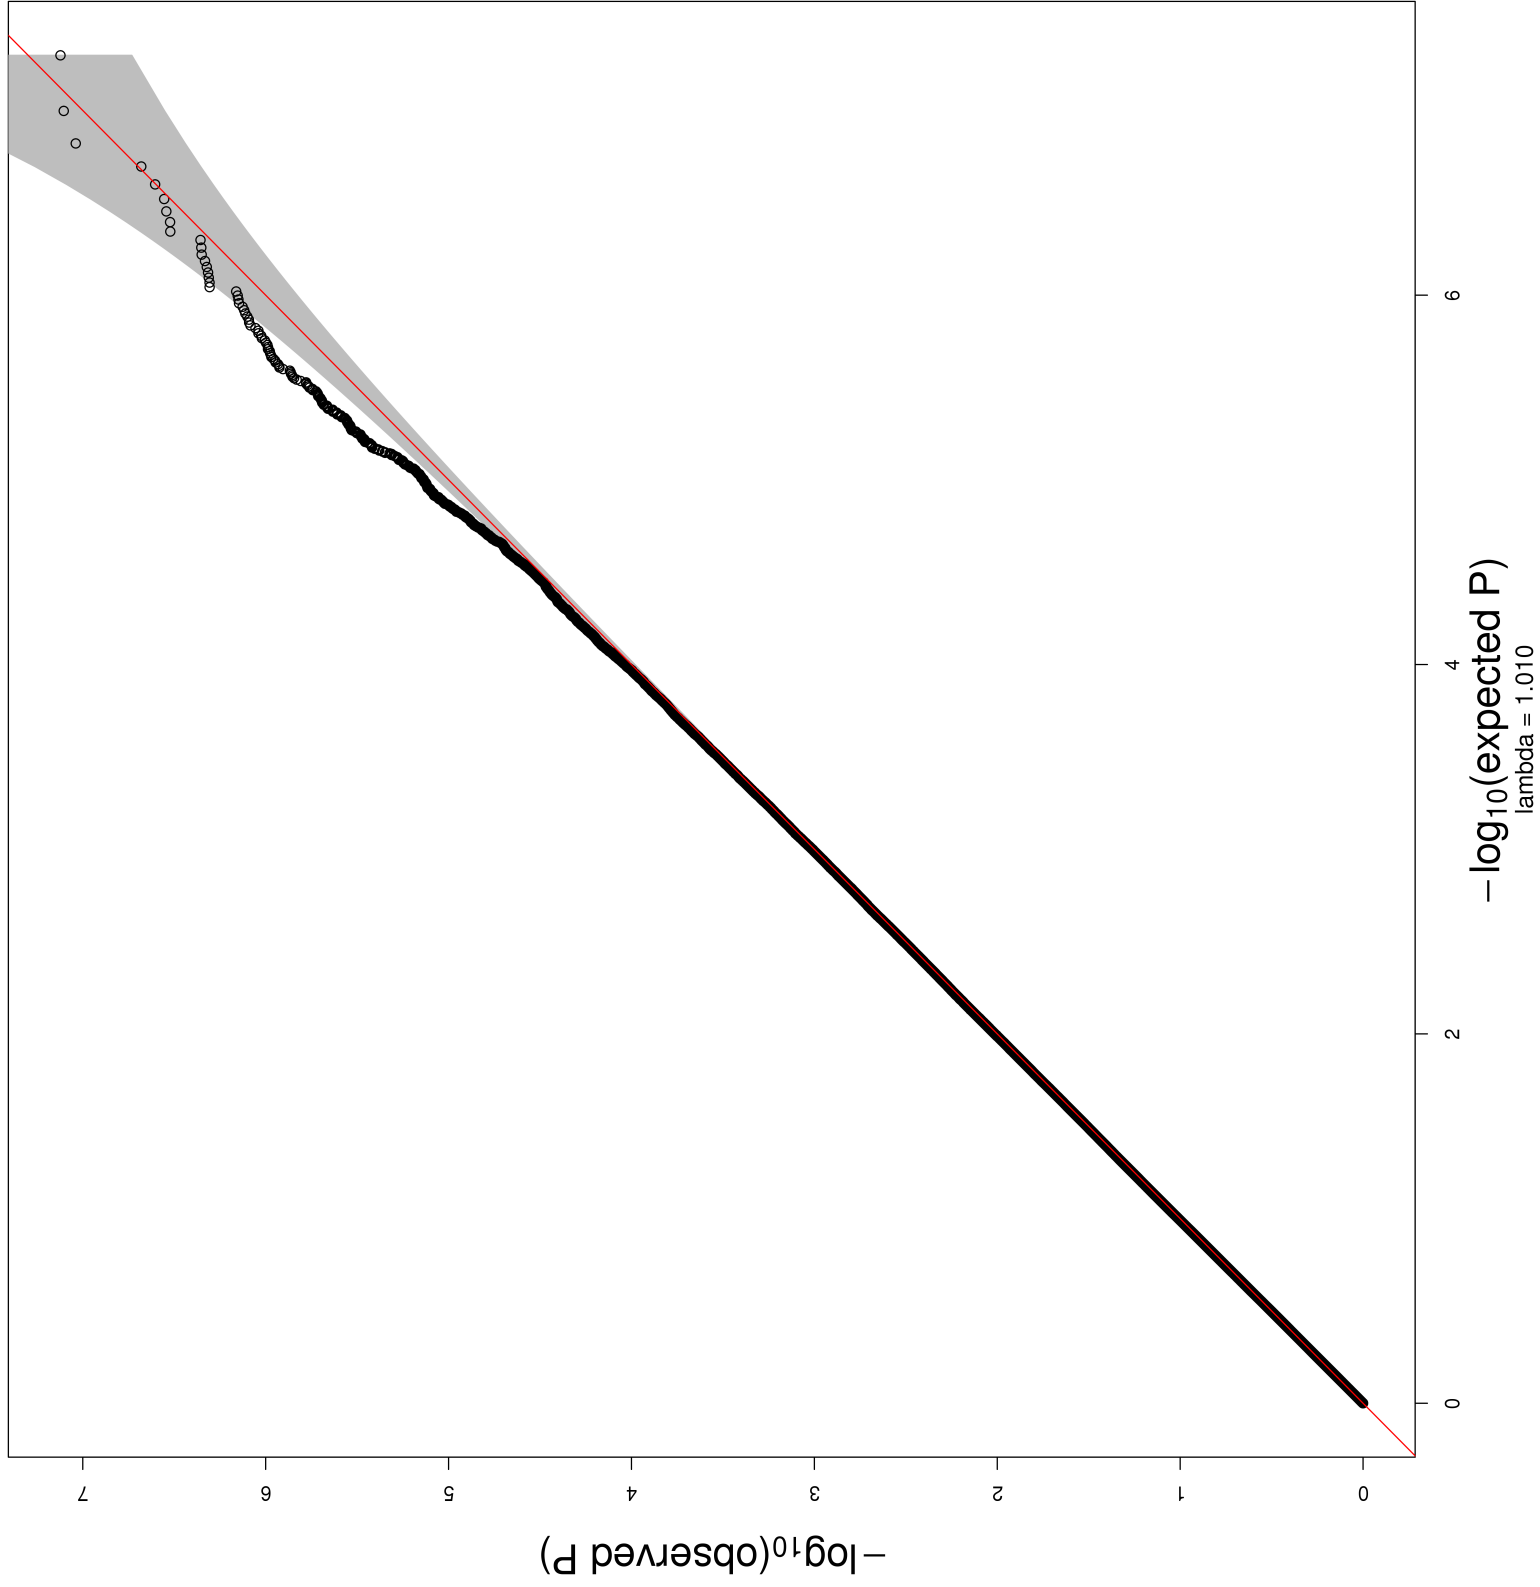

Supplement: Supplemental_Figure_1.pdf [file Supplemental_Figure_1.pdf]

effN > 30, 19890922 SNPs

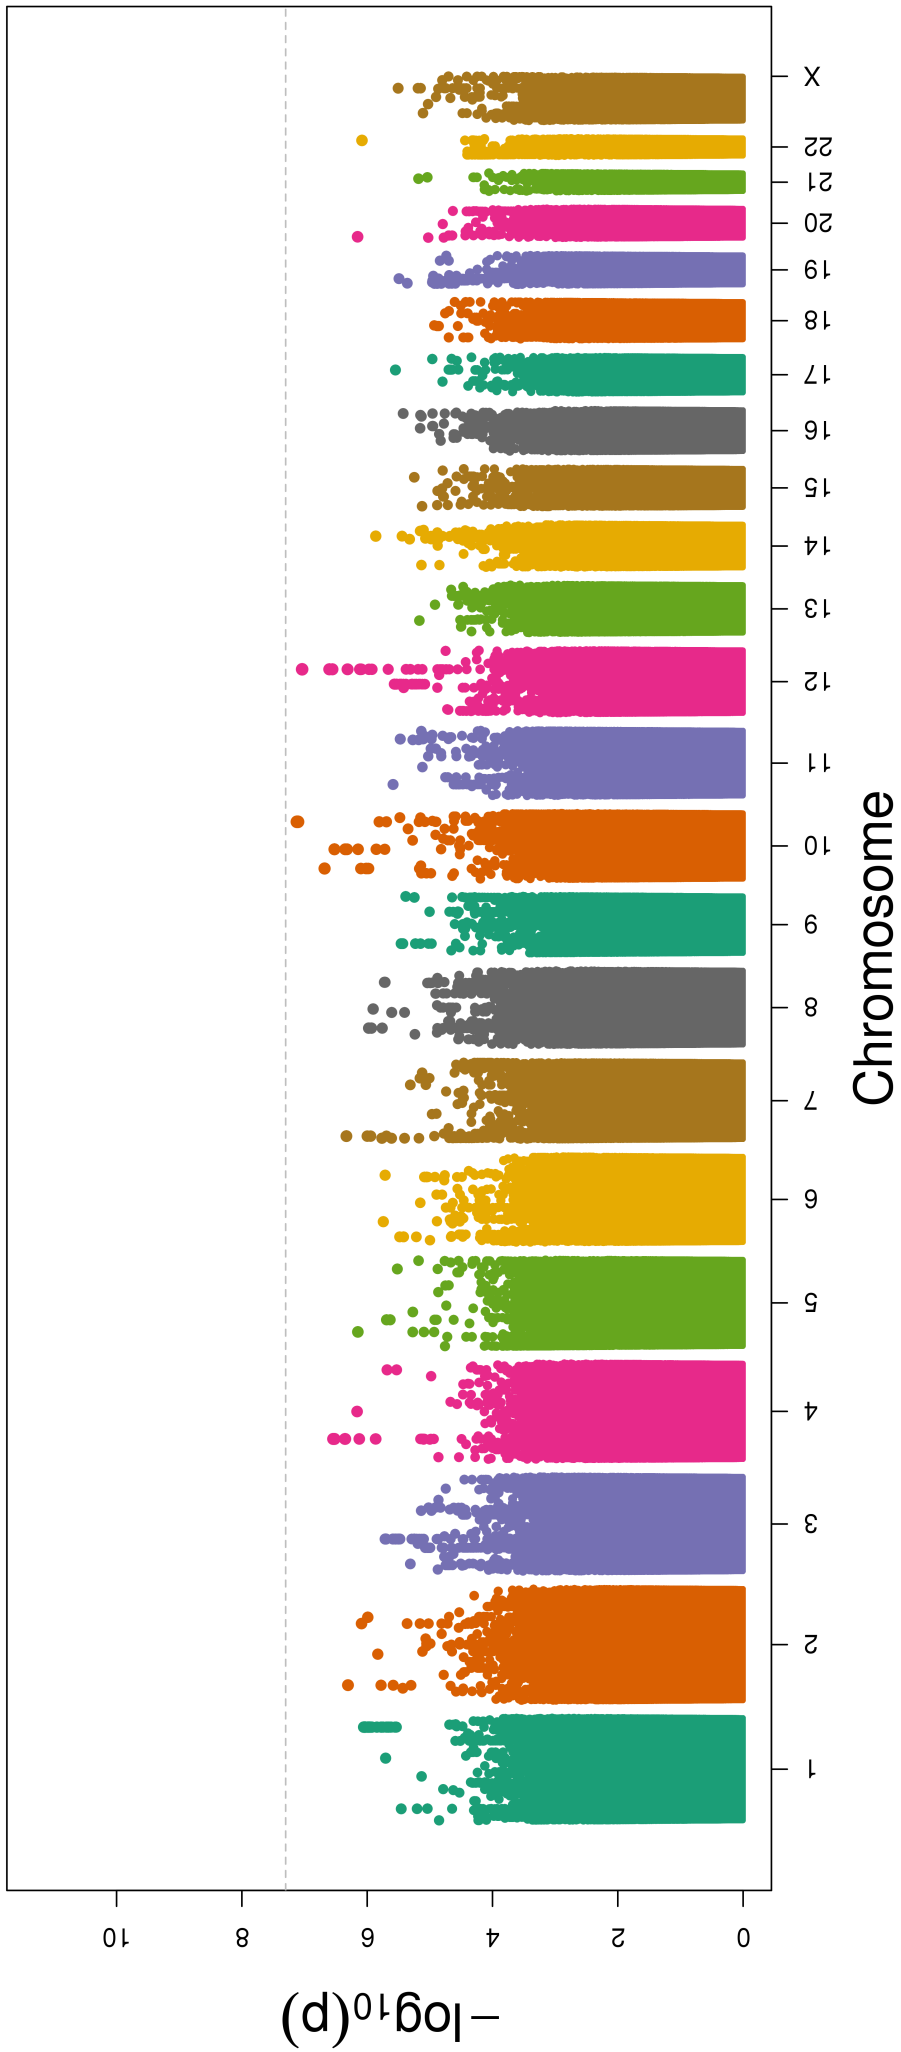

Supplement: Supplemental_Figure_2.pdf [file Supplemental_Figure_2.pdf]

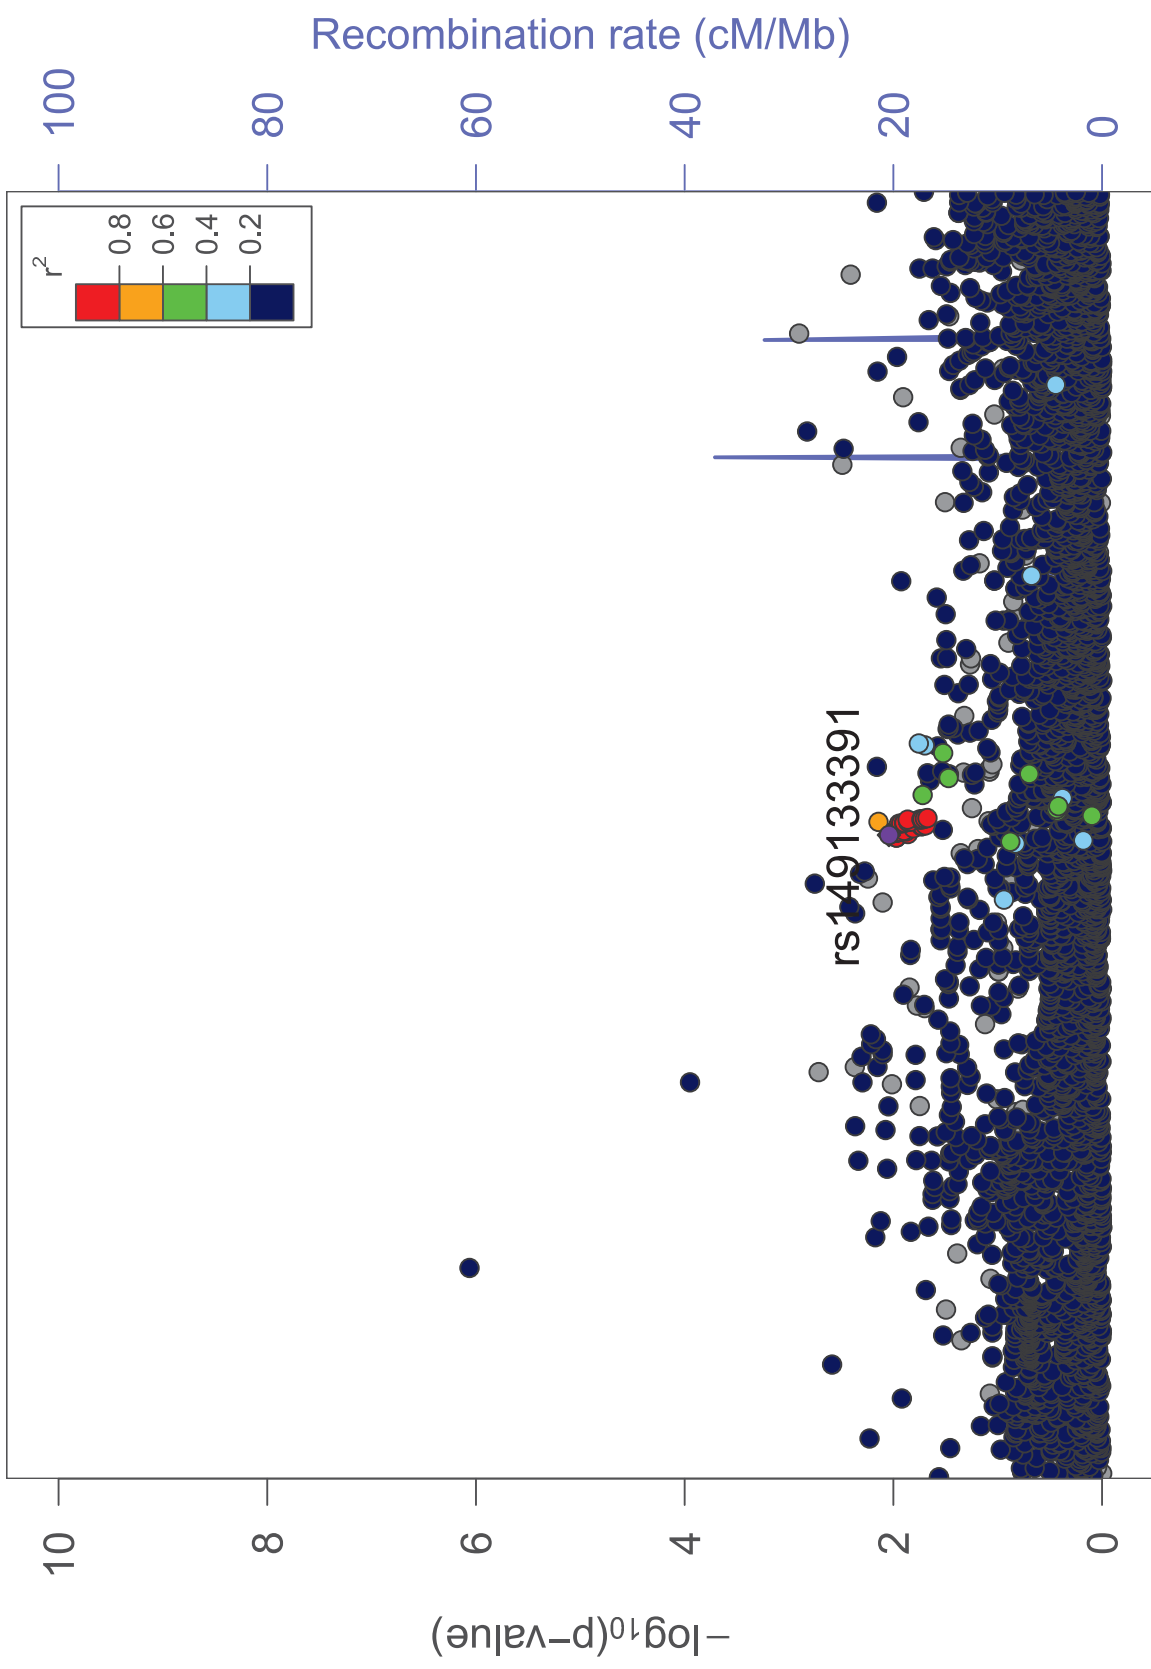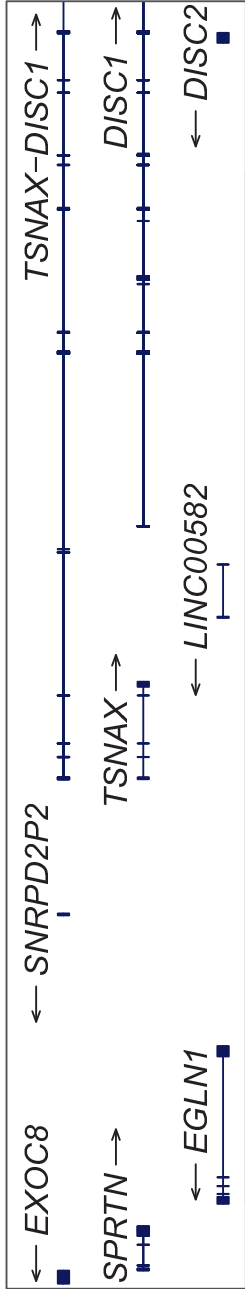

231.5 231.6 231.7 231.8 231.9  
Position on chr1 (Mb)

Supplement: Supplemental_Figure_S3.pdf [file Supplemental_Figure_S3.pdf]
